# Supplementary material for: Occupational trichloroethylene exposure and kidney cancer risk: a meta-analysis
Source: HighWire-hosted journal article supplement (doi:10.1136/oemed-2012-100932), 2012-09-21
Supplement: oemed-2012-100932supp_table.pdf [file oemed-2012-100932supp_table.pdf]

| <b>Supplemental Table 1. Description of Cohort and Case-Control Studies Selected for Meta-analyses</b> |                                       |                                      |                      |                        |                    |                                                                                                                                   |                                                                                                           |                                                                                           |
|--------------------------------------------------------------------------------------------------------|---------------------------------------|--------------------------------------|----------------------|------------------------|--------------------|-----------------------------------------------------------------------------------------------------------------------------------|-----------------------------------------------------------------------------------------------------------|-------------------------------------------------------------------------------------------|
| <b>Author (Year)</b>                                                                                   | <b>Work Force</b>                     | <b>Person-Years</b>                  | <b>Exposed Cases</b> | <b>Study Location</b>  | <b>Cancer Type</b> | <b>Study Description</b>                                                                                                          | <b>Exposure Assessment</b>                                                                                | <b>Calculated Risk</b>                                                                    |
| <b>TCE-Exposure Cohort Studies</b>                                                                     |                                       |                                      |                      |                        |                    |                                                                                                                                   |                                                                                                           |                                                                                           |
| Axelsson et al. (1994) <sup>32</sup>                                                                   | 1,670 (Total)<br>1,727 (TCE exposed)  | 23,516.50                            | 6                    | Sweden                 | Kidney             | Males in workforce biomonitoring for TCE exposure from 115 facilities. Cancer incidence follow-up from 1958 through 1987.         | Company urinary biomonitoring measurements (U-TCA).                                                       | SIR=1.16;<br>95% CI=0.42-2.52                                                             |
| Anttila et al. (1995) <sup>31</sup>                                                                    | 8,974 (Total)<br>3,089 (TCE exposed)  | 71,800 (Total)<br>59,905 (TCE)       | 6                    | Finland                | Kidney             | Workforce biomonitoring for TCE exposure. Cancer incidence follow-up from 1967 through 1992.                                      | Government urinary biomonitoring measurements (U-TCA, B-Per, B-TC).                                       | SIR=0.87;<br>95% CI=0.32-1.89                                                             |
| Henschler et al. (1995) <sup>34</sup>                                                                  | 359 (Total)<br>169 (TCE exposed)      | 5,188 (Exposed)<br>6,100 (Unexposed) | 5                    | Germany                | Kidney             | Male workers at a TCE-using cardboard manufacturing plant. Cancer incidence follow-up from 1956 through 1992.                     | Company work histories, walk-through surveys, interviews, company records. No actual assessment.          | SIR=9.66;<br>95% CI=3.14-22.55                                                            |
| Morgan et al. (1998) <sup>36</sup>                                                                     | 20,508 (Total)<br>4,733 (TCE exposed) | 461,617 (Total)<br>105,852(TCE)      | 8                    | United States, Arizona | Kidney             | Aerospace manufacturing workers assessed for TCE exposure. Cancer mortality follow-up from 1950 through 1993.                     | Company work histories. Long-term employees developed JEM.                                                | SMR=1.32;<br>95% CI=0.57-2.60                                                             |
| Ritz B. (1999) <sup>37</sup>                                                                           | 3,814 (Total)<br>2,971 (TCE exposed)  | 120,237                              | 5                    | United States, Ohio    | Kidney             | Male uranium processing workers assessed for TCE and other chemical exposures. Cancer mortality follow-up from 1951 through 1989. | Company work histories. Long-term employees developed JEM.                                                | SMR=0.65;<br>95% CI=0.21-1.51                                                             |
| Hansen et al. (2001) <sup>16</sup>                                                                     | 803 (Total)                           | 16,730                               | 4                    | Denmark                | Kidney             | Workers from 275 companies assessed for TCE exposure. Cancer incidence follow-up from April 1968 through 1996.                    | Urinary biomonitoring (U-TCA) measurements, which served as individuals' estimates, or use of company air | Men: SIR=0.9;<br>95% CI= 0.2-2.6<br>Women SIR=2.4;<br>95% CI= 0.03-14.0<br>Combined: SIR= |

|                                                    |                                                  |                                   |                |                           |                      |                                                                                                                                                       |                                                                                                                         |                                                   |
|----------------------------------------------------|--------------------------------------------------|-----------------------------------|----------------|---------------------------|----------------------|-------------------------------------------------------------------------------------------------------------------------------------------------------|-------------------------------------------------------------------------------------------------------------------------|---------------------------------------------------|
|                                                    |                                                  |                                   |                |                           |                      |                                                                                                                                                       | measurements.                                                                                                           | 1.1                                               |
| Raaschou-Nielsen et al. (2003) <sup>27</sup>       | 40,049 (Total)<br>14,360 (TCE exposed subcohort) | 339,486 (TCE)                     | 53 (subcohort) | Denmark                   | Renal Cell Carcinoma | Blue collar workers from 347 TCE-using companies followed from April 1968 through 1997 for cancer incidence.                                          | Pension funding records and government industrial hygiene data. Developed "company exposure matrix".                    | Subcohort SIR=1.4; 95% CI= 1.0-1.8                |
| Boice et al. (2006) <sup>26</sup>                  | 41,351 (Total)<br>1,111 (TCE exposed)            | 1,138,610 (Total)<br>39,687 (TCE) | 7              | United States, California | Kidney               | Aircraft workers in a rocket engine testing facility assessed for TCE exposure. Cancer mortality follow-up from 1948 through 1999.                    | Company work histories, walk-through surveys, interviews. Developed JEM.                                                | SMR=2.22; 95% CI= 0.89-4.57                       |
| Radican et al. (2008) <sup>22</sup>                | 14,457 (Total)<br>7,204 (TCE exposed)            | NR                                | 18             | United States, Utah       | Kidney               | Aircraft maintenance workers assessed for TCE exposure. Cancer incidence follow-up from 1973 through 1990; cancer mortality follow-up from 1953-2000. | Company work histories, walk-through surveys, interviews, and industrial hygiene, other company records. Developed JEM. | HR=1.18; 95% CI= 0.47-2.94                        |
| Lipworth et al. (2011) <sup>24</sup>               | 77,943 (Total)<br>2,267 (routinely TCE exposed); | 1,889,790 (Total)<br>76,009 (TCE) | 8 (routinely)  | United States, California | Kidney               | Aircraft manufacturing workers assessed for TCE exposure. Cancer mortality follow-up from 1960 through 2008.                                          | Company work histories, walk-through surveys, interviews, industrial hygiene records. Developed JEM.                    | Routinely TCE Exposed SMR=0.83; 95% CI= 0.36-1.64 |
| <b>Chlorinated Solvent-Exposure Cohort Studies</b> |                                                  |                                   |                |                           |                      |                                                                                                                                                       |                                                                                                                         |                                                   |
| Garabrant et al. (1988) <sup>33</sup>              | 14,067 (Total)                                   | 222,100                           | 12             | United States, California | Kidney               | Workers in a TCE-using aircraft manufacturing plant followed for cancer mortality from 1958 through 1982.                                             | Company work histories. No actual assessment.                                                                           | SMR=0.93; 95% CI= 0.48-1.64                       |

|                                          |                                                                             |                                      |    |                         |                                      |                                                                                                                                                                                                                                                                     |                                                                                                                           |                                 |
|------------------------------------------|-----------------------------------------------------------------------------|--------------------------------------|----|-------------------------|--------------------------------------|---------------------------------------------------------------------------------------------------------------------------------------------------------------------------------------------------------------------------------------------------------------------|---------------------------------------------------------------------------------------------------------------------------|---------------------------------|
| Selden and Ahlborg (1991) <sup>38</sup>  | 2,176 (Total)<br>1,865 (Air force)                                          | 21,463 (Total)<br>18,411 (Air force) | 2  | Sweden                  | Kidney                               | Men in the Armed Forces exposed to jet fuel were followed for cancer incidence from 1975 through 1983.                                                                                                                                                              | TCE used for metal degreasing. Member of the air force assumed exposed. No individual exposure data.                      | SIR=0.83;<br>95% CI= 0.10-2.99  |
| Sinks et al. (1992) <sup>39</sup>        | 20,50 (Total)                                                               | 36,744                               | 6  | United States, Georgia  | Renal Cell Carcinoma                 | Workers from a TCE-using paperboard manufacturing and processing plant were followed for cancer incidence and mortality from 1957 through June 1988.                                                                                                                | Company work histories, material safety data sheets, but no actual assessment.                                            | SIR=3.7;<br>95% CI= 1.4-8.1     |
| McLean et al. (2006) <sup>35</sup>       | 60,468 (Total)                                                              | 1,347,782                            | 54 | International           | Kidney                               | Workers in the pulp and paper industry across 11 countries were assessed for exposure to volatile organochlorines (indicator agents being TCE, perchloroethylene, dichloromethane, and trichloromethane). Cancer mortality follow-up varied by country (1943-1996). | Company work histories, detailed company questionnaires and air measurements. Developed "department exposure matrix".     | SMR=0.77;<br>95% CI= 0.58-1.01  |
| Sung et al. (2007) <sup>40</sup>         | 63,982 (Total)                                                              | 1,403,824                            | 15 | Taiwan                  | Kidney & Urinary (excluding bladder) | Female workers in a TCE-using electronics plant were followed for cancer incidence from 1979 through 2001.                                                                                                                                                          | Insurance work histories, factory inspection records. No actual assessment.                                               | SIR= 1.10;<br>95% CI= 0.62-1.82 |
| <b>TCE-Exposure Case-Control Studies</b> |                                                                             |                                      |    |                         |                                      |                                                                                                                                                                                                                                                                     |                                                                                                                           |                                 |
| Asal et al. (1988) <sup>41</sup>         | 315 cases; 313 hospital- and 336 population-based controls; 29 TCE exposed. | NA                                   | 19 | United States, Oklahoma | Renal Cell Carcinoma                 | The association between predominant occupation/industry and cancer risk assessed via questionnaires.                                                                                                                                                                | Self-reported lifetime occupational histories. No assessment. TCE exposure assumed in metal degreasing/cleaning industry. | OR=1.7;<br>95% CI= 0.7-3.8      |

|                                        |                                                                            |    |    |                              |                      |                                                                                                                                                 |                                                                                                                                                         |                              |
|----------------------------------------|----------------------------------------------------------------------------|----|----|------------------------------|----------------------|-------------------------------------------------------------------------------------------------------------------------------------------------|---------------------------------------------------------------------------------------------------------------------------------------------------------|------------------------------|
| Harrington et al. (1989) <sup>46</sup> | 54 cases; 54 population-based controls; 8 TCE exposed.                     | NA | 3  | United Kingdom               | Renal Cell Carcinoma | The association between lifetime occupational histories and exposure to solvents and cancer risk assessed via questionnaires and interviews.    | Self-reported job, industry, materials and key materials and processes. No assessment. Job of metal degreasing/cleaning industry; TCE exposure assumed. | OR=1.0; 95% CI= 0.2-4.9      |
| Siemiatycki (1991) <sup>18</sup>       | 177 cases; 3,014 mixed-based controls; 4 TCE exposed kidney cancers cases. | NA | 4  | Canada                       | Kidney               | The association between exposure to life-time TCE exposure and cancer risk assessed via questionnaires and interviews.                          | Self-reported occupational histories with additional occupation-specific questionnaires. Expert review (subject-specific) for TCE.                      | OR=0.8; 95% CI= 0.4-2.0      |
| Greenland et al. (1994) <sup>45</sup>  | 12 cases; 1,202 population-based controls.                                 | NA | NR | United States, Massachusetts | Kidney               | A nested case-control study where cancer risk assessed among male workers in a TCE-using transformer assembly plant.                            | Insurance pension records for work histories. Long-term workers developed JEM.                                                                          | OR=0.99; 95% CI= 0.30-3.32   |
| Vamvakas et al. (1998) <sup>50</sup>   | 58 cases; 84 hospital-based controls; 24 TCE exposed.                      | NA | 19 | Germany                      | Renal Cell Carcinoma | The association between life-time occupational TCE exposure and cancer risk assessed via questionnaires and interviews.                         | Self-reported occupational histories that included hazardous chemicals, insurance and worker compensation records (appears subject-specific).           | OR=10.80; 95% CI= 3.36-34.75 |
| Dosemeci et al. (1999) <sup>44</sup>   | 438 cases; 687 population-based controls; 55 TCE exposed cases.            | NA | 55 | United States, Minnesota     | Renal Cell Carcinoma | The association between occupational TCE exposure in the most recent and usual job and industry and cancer risk assessed via questionnaires and | Self-reported most recent and usual job and industry with activities, and dates, and duration in 13 industries and 7 jobs. Applied JEM.                 | OR=1.3; 95% CI= 0.9-1.9      |

|                                                          |                                                                    |    |     |                          |                      |                                                                                                                         |                                                                                                                                                                         |                                          |
|----------------------------------------------------------|--------------------------------------------------------------------|----|-----|--------------------------|----------------------|-------------------------------------------------------------------------------------------------------------------------|-------------------------------------------------------------------------------------------------------------------------------------------------------------------------|------------------------------------------|
|                                                          |                                                                    |    |     |                          |                      | interviews.                                                                                                             |                                                                                                                                                                         |                                          |
| Pesch et al. (2000) <sup>17</sup>                        | 935 cases; 4,298 population-based controls; 172 TCE exposed cases. | NA | 172 | Germany                  | Renal Cell Carcinoma | The association between cancer risk and exposure to chlorinated solvent assessed via questionnaires and interviews.     | Self-report occupational histories with supplemental questions on tasks with exposures of interest, the exposure and frequency. Applied a job and task exposure matrix. | Calculated Men and Women Combined OR=1.2 |
| Bruning et al. (2003) <sup>42</sup>                      | 134 cases; 401 hospital-based controls; 63 TCE exposed.            | NA | 25  | Germany                  | Renal Cell Carcinoma | The association between life-time occupational TCE exposure and cancer risk assessed via questionnaires and interviews. | Self-reported occupational histories, supplemental info on tasks and frequency and duration to TCE. Applied JEM.                                                        | OR=2.47; 95% CI= 1.36-4.49               |
| Charbotel et al. (2006) <sup>43</sup>                    | 86 cases; 316 mixed-based controls; 147 TCE exposed.               | NA | 37  | France                   | Renal Cell Carcinoma | The association between occupational TCE exposure and cancer risk assessed via questionnaires and interviews.           | Self-reported occupational histories. For one task, task-specific JEM.                                                                                                  | OR=1.64; 95% CI= 0.95-2.84               |
| Moore et al. (2010) <sup>11</sup>                        | 1,097 cases; 1,476 hospital-based controls; 88 TCE exposed.        | NA | 48  | Central & Eastern Europe | Renal Cell Carcinoma | The association between occupational TCE exposure and cancer risk assessed via questionnaires and interviews.           | Self-reported occupational histories with specialized questionnaires. Expert review (subject-specific).                                                                 | OR=1.63; 95% CI= 1.04-2.54               |
| <b>Chlorinated Solvent-Exposure Case-Control Studies</b> |                                                                    |    |     |                          |                      |                                                                                                                         |                                                                                                                                                                         |                                          |

|                                        |                                                                 |    |    |               |                      |                                                                                                                                                   |                                                                                                            |                             |
|----------------------------------------|-----------------------------------------------------------------|----|----|---------------|----------------------|---------------------------------------------------------------------------------------------------------------------------------------------------|------------------------------------------------------------------------------------------------------------|-----------------------------|
| Partanen et al. (1991) <sup>47</sup>   | 338 cases, 338 population-based controls; 22 TCE exposed cases. | NA | 22 | Finland       | Renal Cell Carcinoma | The association between various occupations and cancer risk assessed via questionnaires and interviews.                                           | Self-reported occupational histories. No assessment. TCE exposure assumed for iron and metal ware workers. | OR=1.87; 95% CI= 0.94-3.76  |
| Poole et al. (1993) <sup>48</sup>      | 102 cases; 431 population-based controls; 74 TCE exposed.       | NA | 12 | United States | Renal Cell Carcinoma | The association between cancer risk and exposure chlorinated solvent exposure assessed among male refinery workers from five petroleum companies. | Company work histories, walk-through surveys by long-term workers.                                         | OR=0.69; 95% CI= 0.321-1.50 |
| Schlehofer et al. (1995) <sup>49</sup> | 227 cases; 286 population-based controls; 39 TCE exposed.       | NA | 27 | Germany       | Renal Cell Carcinoma | The association between cancer risk and exposure to chlorinated solvent exposure assessed via questionnaires and interviews.                      | Self-reported occupational histories. Developed JEM.                                                       | OR=2.52; 95% CI= 1.23-5.16  |

Abbreviations: B-Per- blood perchloroethylene; B-TC- blood 1,1,1-trichloroethane; FINJEM- Finnish National job exposure matrix; HR- hazard ratio; JEM- job exposure matrix; NA- not applicable; NR- not reported; OR- odds ratio; SMR- standard mortality ratio; SIR- standard incidence ratio; RR- risk ratio; TCE- trichloroethylene; U-TCA-urinary trichloroacetic acid.
